# Supplementary material
Source: publisher figshare collection journal article supplement (https://acs.figshare.com/ndownloader/files/14531219)
Supplement: Supplementary file 1 [file 14531219]

## **Supporting Information**

### **Laser-Induced Graphene-PVA Composites as Robust Electrically Conductive Water Treatment Membranes**

Amit K. Thakur,<sup>†</sup> Swatantra P. Singh,<sup>†‡</sup> Maurício Nunes Kleinberg, Abhishek Gupta and  
Christopher J. Arnusch<sup>\*</sup>

Department of Desalination and Water Treatment, Zuckerberg Institute for Water Research, The  
Jacob Blaustein Institutes for Desert Research, Ben-Gurion University of the Negev, Sede-Boqer  
Campus, Midreshet Ben Gurion, 84990, Israel

<sup>‡</sup>Center for Environmental Science and Engineering (CESE), Indian Institute of Technology  
Bombay, Powai, Mumbai 400076, India

<sup>†</sup>Authors with equal contribution

**\*Corresponding author:** Dr. C. J. Arnusch, [arnusch@bgu.ac.il](mailto:arnusch@bgu.ac.il)

**Table S1.** Membrane performance for LIG control membrane.

| Parameters                          | Values   |
|-------------------------------------|----------|
| Water flux (LMH bar <sup>-1</sup> ) | 24801±18 |
| BSA adsorption (%)                  | 2.5±0.4  |
| BSA rejection (%)                   | 3.9±1.3  |
| Bacteria removal (%)                | 18.3±4.9 |

**Table S2.** Membrane performance for LIG-PVA-0.5 and LIG-PVA-4 membranes before and after 1 hour sonication.

□

| Parameters                          | LIG-PVA-0.5 | LIG-PVA-4  |
|-------------------------------------|-------------|------------|
| <b>Before sonication</b>            |             |            |
| Water flux (LMH bar <sup>-1</sup> ) | 5569±28     | 222.8±10.5 |
| BSA rejection (%)                   | 9.7±1.5     | 61.8±1.2   |
| <b>After sonication</b>             |             |            |
| Water flux (LMH bar <sup>-1</sup> ) | 5484±27     | 219.7±10.6 |
| BSA rejection (%)                   | 9.5±1.9     | 60.9±1.4   |

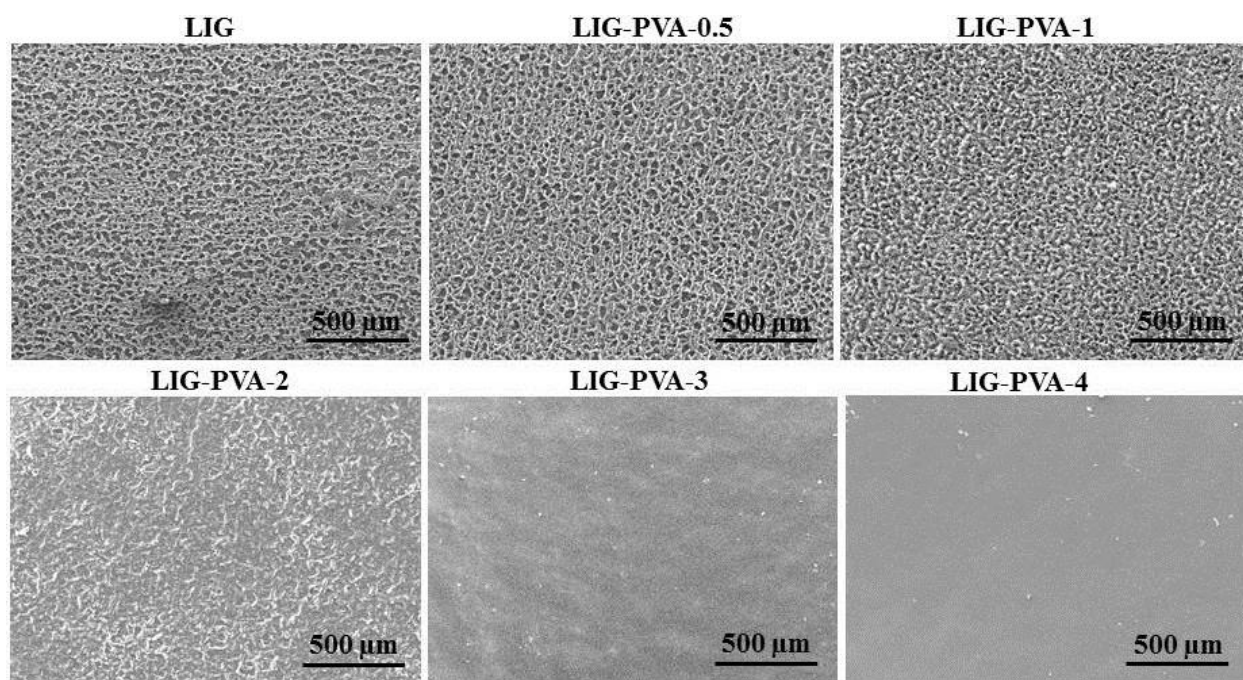

**Figure S1.** SEM images of different LIG-PVA composite membranes at low magnification.

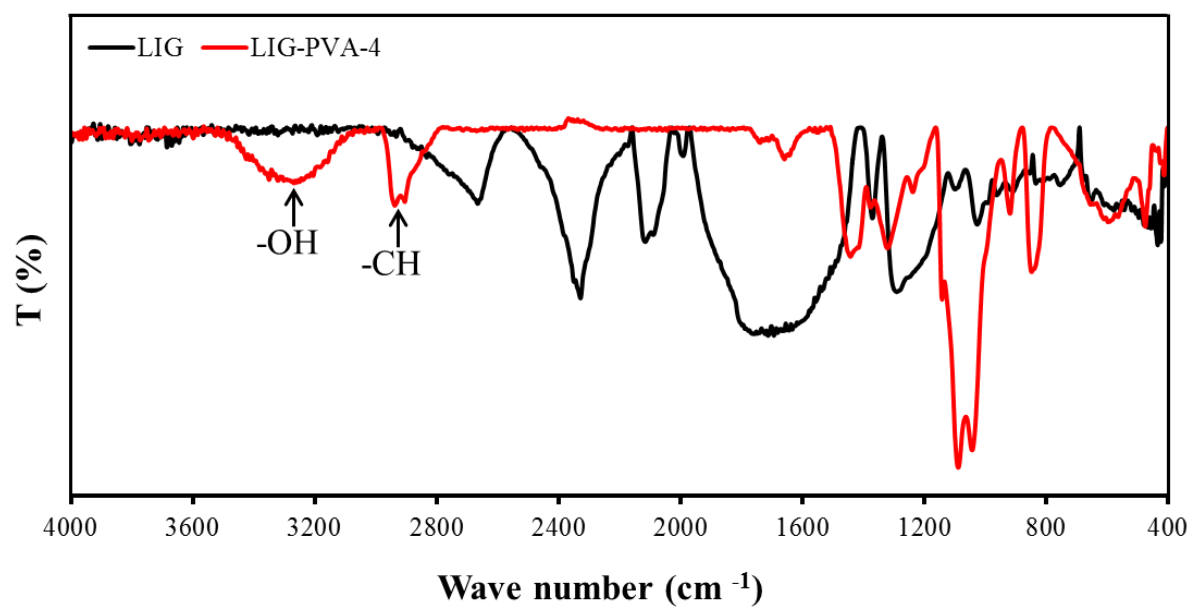

**Figure S2.** FTIR spectra of LIG (black line) and LIG-PVA-4 membrane (red line).

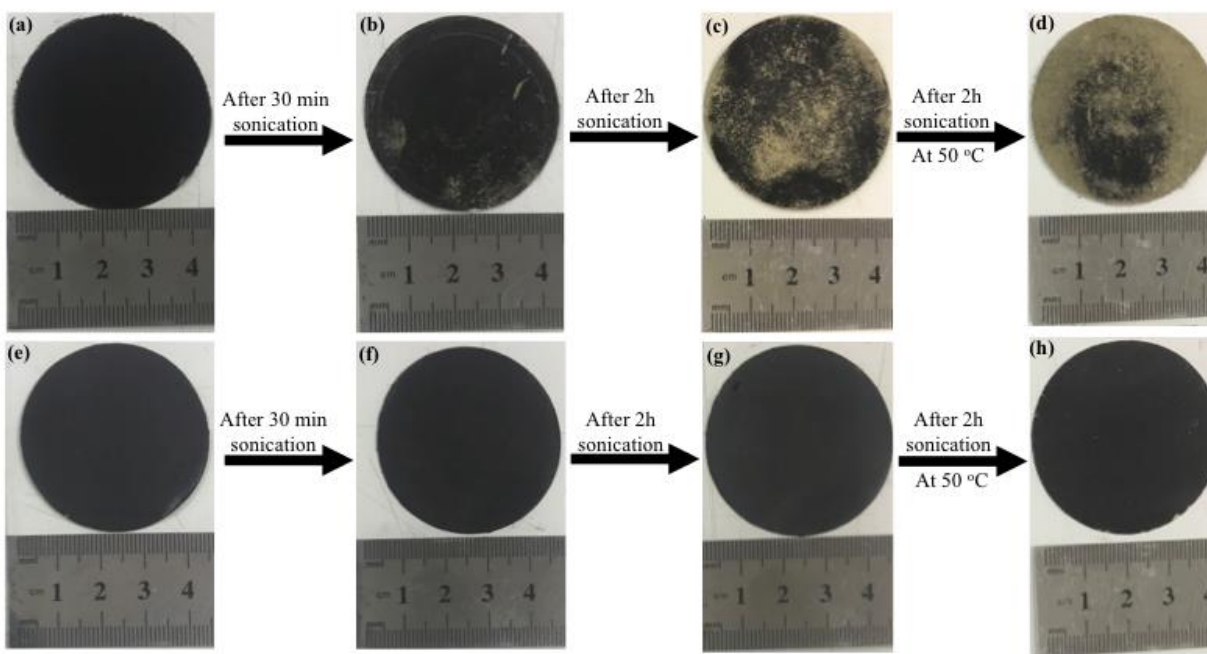

**Figure S3.** Stability tests. LIG substrate (a) before sonication, (b) after 30 min sonication, (c) after an additional 2h sonication, and (d) after an additional 2h sonication at 50 °C. LIG-PVA-0.5 membrane (e) before sonication, (f) after 30 min sonication, (g) after an additional 2h sonication, and (h) after an additional 2h sonication at 50 °C.

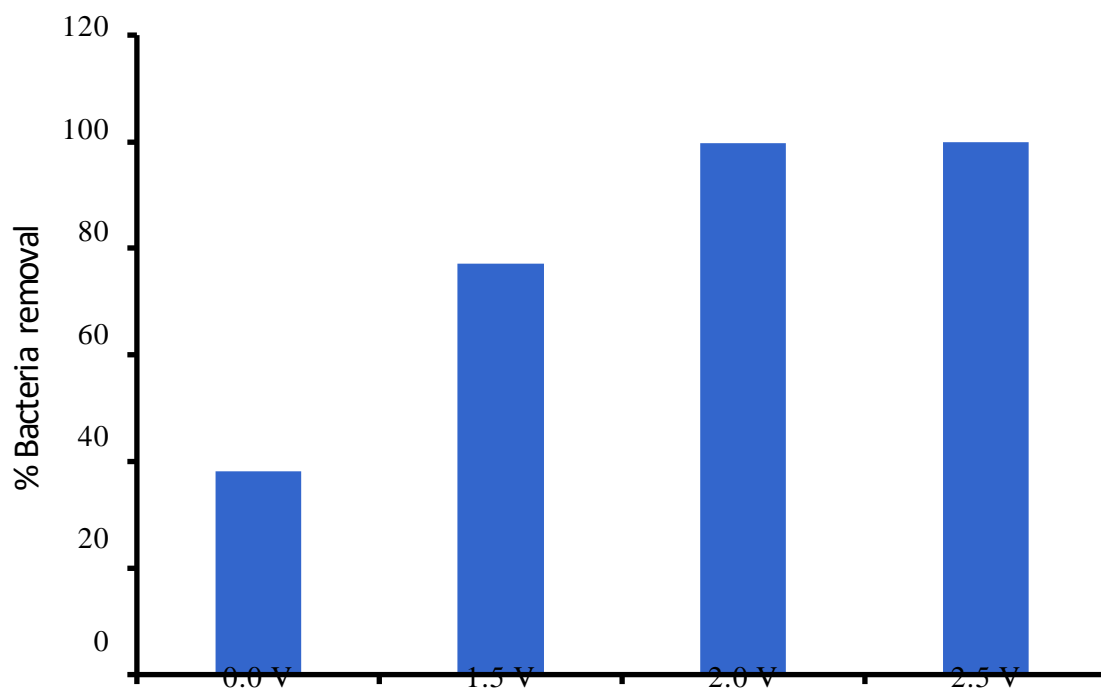

**Figure S4.** Percentage removal of the bacterial cells by the LIG-PVA-0.5 membrane with increasing applied voltage.
